# Supplementary material for: Series of edge-sharing bi-triangle Ln4clusters with a μ4-NO3−bridge: syntheses, structures, luminescence, and the SMM behavior of the Dy4analogue
Source: Royal Society of Chemistry journal article supplement (doi:10.1039/c3dt52316k), 2013-11-22
Supplement: c3dt52316k.pdf [file c3dt52316k.pdf]

# Series of Edge-sharing Bi-triangle $\text{Ln}_4$ Clusters with a $\mu_4\text{-NO}_3^-$ Bridge: Syntheses, Structures, Luminescence, and the SMM Behavior for the $\text{Dy}_4$ Analogue

Hua-Hong Zou, Rong Wang, Zi-Lu Chen, Dong-Cheng Liu, Fu-Pei Liang\*

Key Laboratory for the Chemistry and Molecular Engineering of Medicinal Resources (Ministry of Education of China), School of Chemistry & Pharmaceutical Sciences of Guangxi Normal University, Guilin 541004, P. R. China.

Corresponding author E-mail: [fliangoffice@yahoo.com](mailto:fliangoffice@yahoo.com)

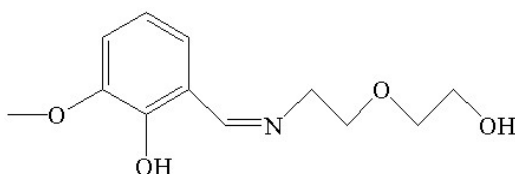

Scheme S1. Representation of the 2-([2-(2-hydroxy-ethoxy)-ethylimino]-methyl)-6-methoxyphenol ligand.

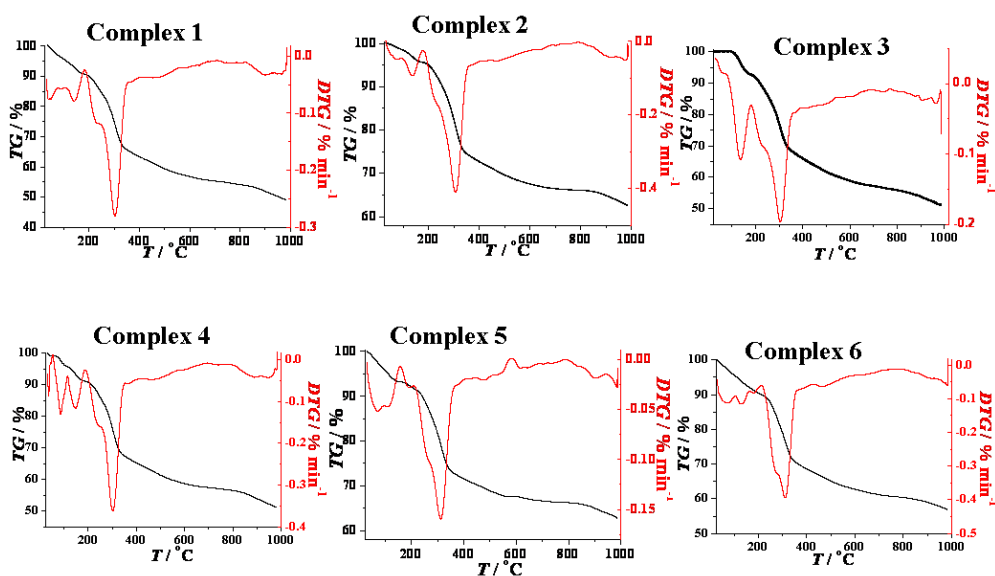

Fig. S1 TG-DTG curves of complexes 1–6.

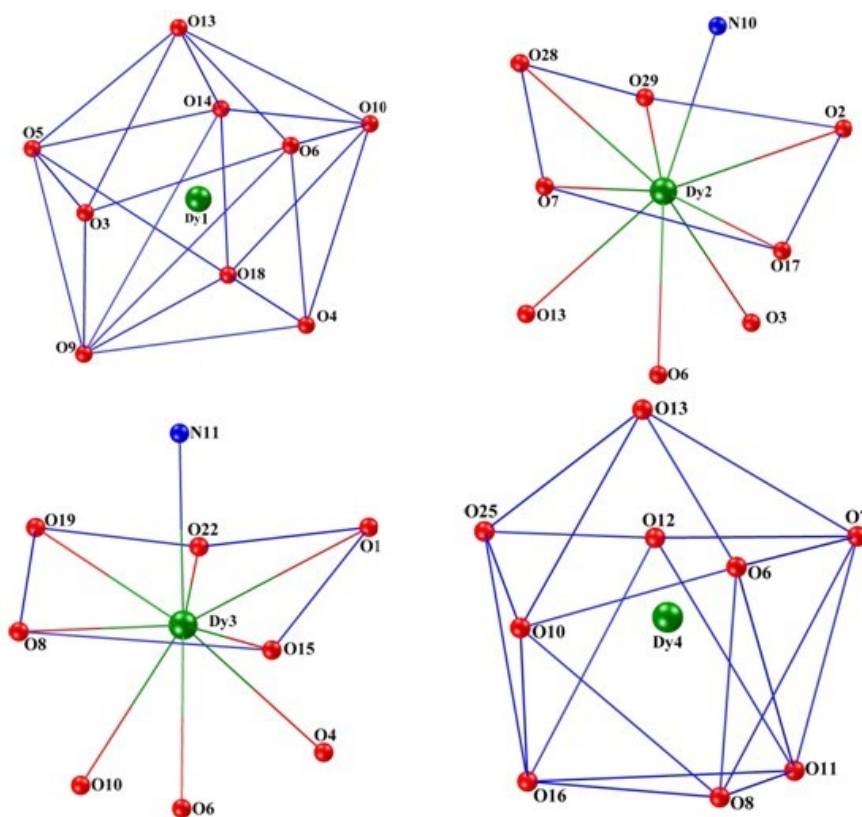

Fig S2. coordination environment of the dysprosium(III) ion Dy1, Dy2, Dy3, and Dy4.

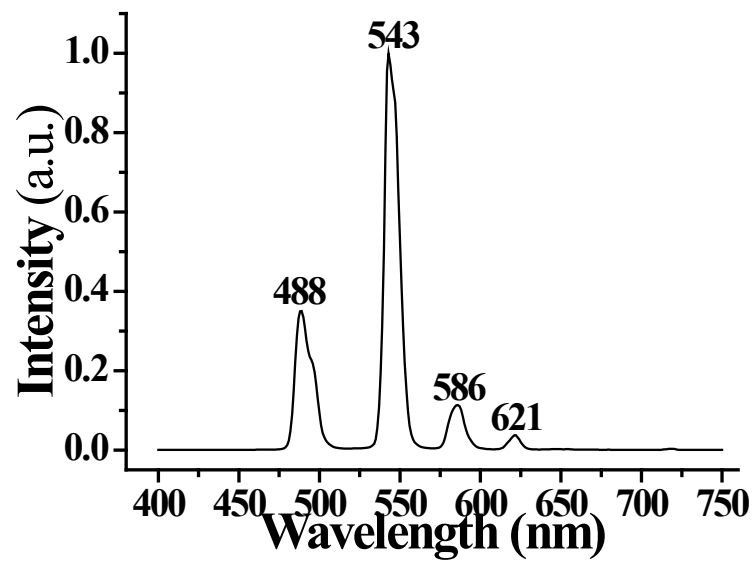

Fig S3. Emission spectra of **2** (excited at 362 nm) in the solid state at 77 K.

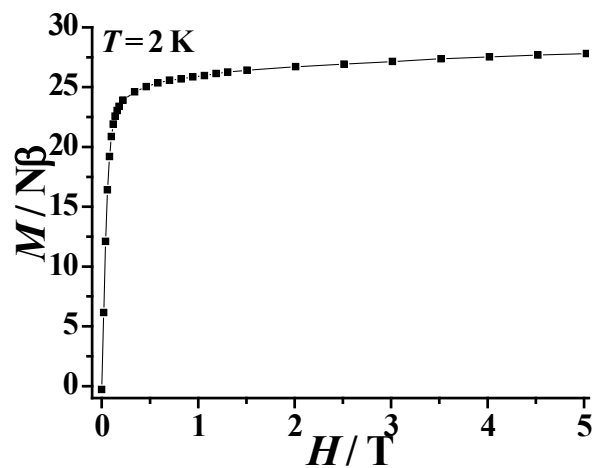

Fig. S4  $M$  versus  $H$  curve of 1 at 2 K.

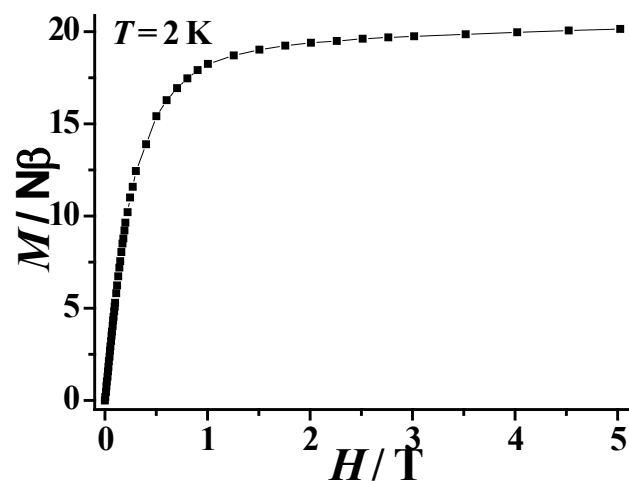

Fig. S5  $M$  versus  $H$  curve of 3 at 2 K.

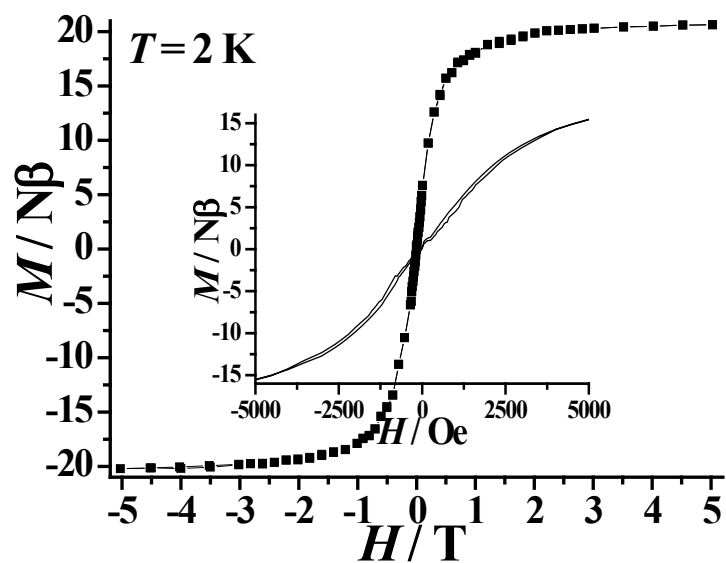

Fig. S6 Magnetic hysteresis loop of 3 recorded at 2 K (Inset: the enlarged picture of hysteresis loop).

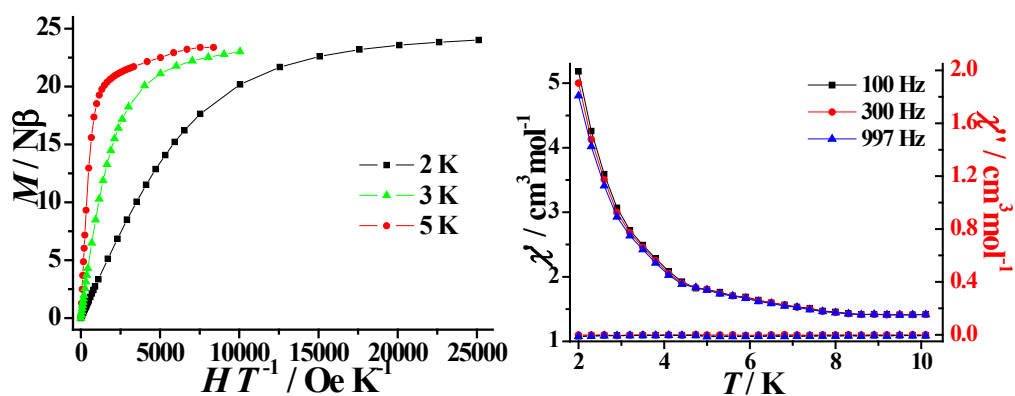

Fig. S7 The plot of the reduced magnetization vs.  $H/T$  for **2** in the field range 0–5 T and temperature range 2–5 K (left), temperature dependent in-phase and out-of-phase ac susceptibility for **2** in the absence of a dc field ( $H_{ac} = 2.5$  Oe, right).

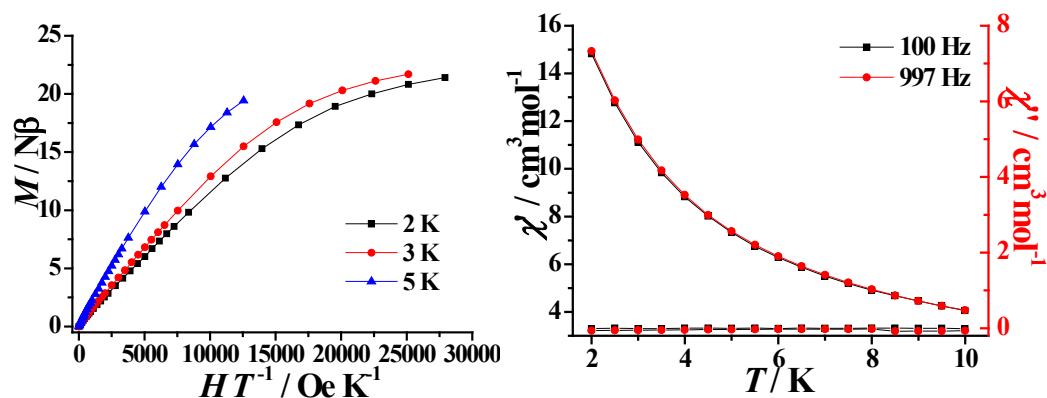

Fig. S8 The plot of the reduced magnetization vs.  $H/T$  for **4** in the field range 0–5 T and temperature range 2–5 K, temperature dependent in-phase and out-of-phase ac susceptibility for **4** in the absence of a dc field ( $H_{ac} = 2.5$  Oe, right).

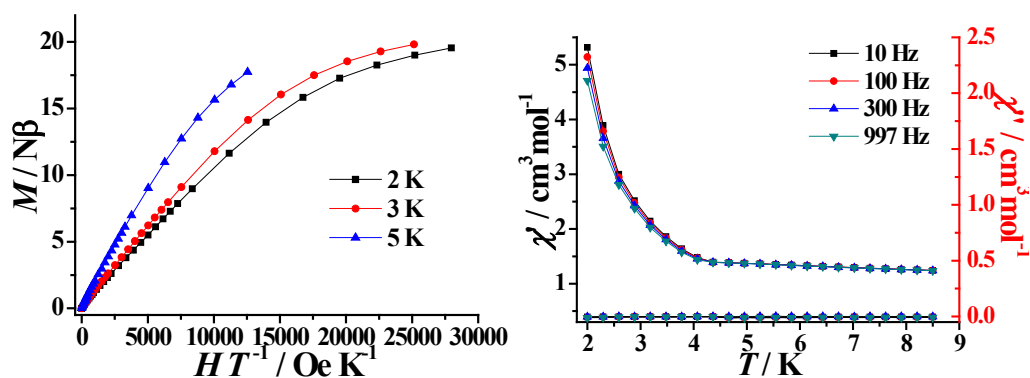

Fig. S9 The plot of the reduced magnetization vs.  $H/T$  for **5** in the field range 0–5 T and temperature range 2–5 K (left), Temperature dependent in-phase and out-of-phase ac susceptibility for **5** in the absence of a dc field. ( $H_{ac} = 2.5$  Oe, right).

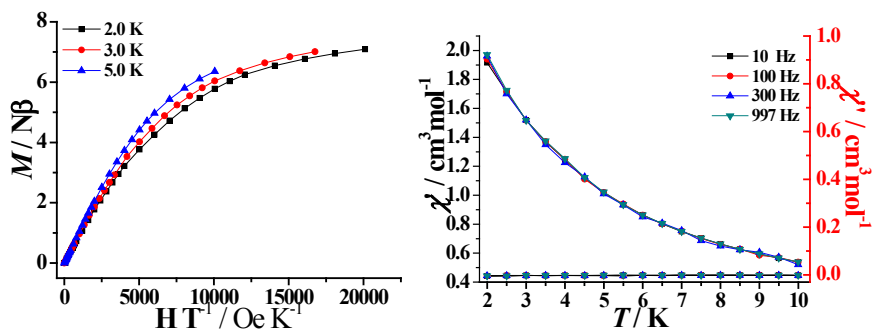

**Fig. S10** The plot of the reduced magnetization vs.  $H/T$  for **6** in the field range 0–5 T and temperature range 2–5 K (left), Temperature dependent in-phase and out-of-phase ac susceptibility for **6** in the absence of a dc field. ( $H_{\text{ac}} = 2.5$  Oe, right).

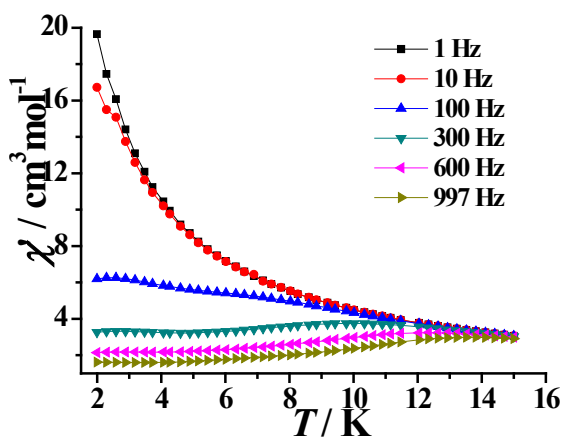

**Fig. S11** Temperature dependent in-phase ac susceptibility for **3** in the absence of a dc field. ( $H_{\text{ac}} = 2.5$  Oe)

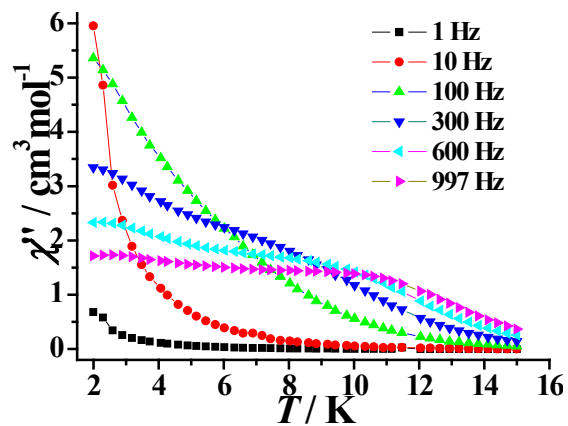

**Fig. S12** Temperature dependent out-of-phase ac susceptibility in the absence of a dc field. ( $H_{\text{ac}} = 2.5$  Oe)

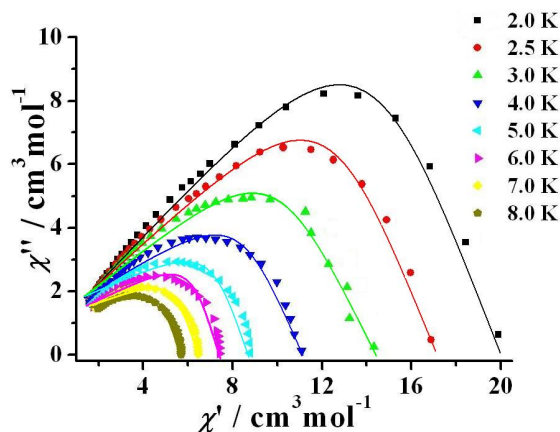

**Figure S13.** Cole-Cole diagram of **3** at 2.0–8.0 K with zero dc field; the solid lines are the best fits to the experimental data, obtained with the generalized Debye model.

To examine the process of magnetization relaxation, ac magnetic susceptibilities were employed to construct a Cole–Cole plot. The results are shown in Fig. S12, in which the solid lines represent the least-square fits of the theoretical curve based on Eqs. (1) and (2).

$$\chi'(v_{ac}) = \chi_{\infty} + \frac{(\chi_0 - \chi_{\infty})[1 + (2\pi v_{ac} \tau)^{1-\alpha} \sin(\alpha\pi/2)]}{1 + 2(2\pi v_{ac} \tau)^{1-\alpha} \sin(\alpha\pi/2) + (2\pi v_{ac} \tau)^{2(1-\alpha)}} \quad (1)$$

$$\chi''(v_{ac}) = \frac{(\chi_0 - \chi_{\infty})(2\pi v_{ac} \tau)^{1-\alpha} \cos(\alpha\pi/2)}{1 + 2(2\pi v_{ac} \tau)^{1-\alpha} \sin(\alpha\pi/2) + (2\pi v_{ac} \tau)^{2(1-\alpha)}} \quad (2)$$

Where  $\chi_{\infty}$  is the adiabatic susceptibility,  $\chi_0$  is the isothermal susceptibility, and  $\tau$  is the magnetization relaxation time. The parameter  $\alpha$  is an indicator of the distribution of relaxation time. An analysis of the Cole–Cole plots at different temperatures show a parameters ranging from 0.18 to 0.32. Because these values are deviated from zero, the magnetization relaxation seem more likely to involve a distribution of relaxation processes.

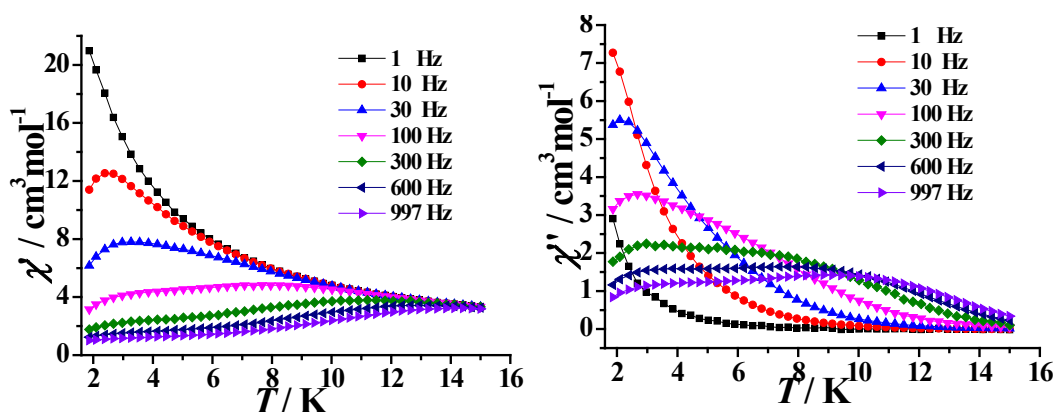

**Fig. S14** Temperature dependent in-phase (left) and out-of-phase ac susceptibility in the 1000 Oe dc field. ( $H_{ac} = 2.5$  Oe)

Table S1. Bond Length and Bond Angle Parameters for Complexes 1–6.

| Ln         | Gd (1)   | Tb (2)   | Dy (3)   | Ho (4)   | Er (5)    | Yb(6)      |
|------------|----------|----------|----------|----------|-----------|------------|
| Ln1-O3     | 2.390(6) | 2.371(3) | 2.362(3) | 2.346(2) | 2.335(2)  | 2.3122(7)  |
| Ln1-O4     | 2.268(6) | 2.254(3) | 2.242(4) | 2.251(2) | 2.240(2)  | 2.2071(8)  |
| Ln1-O5     | 2.474(6) | 2.458(3) | 2.451(4) | 2.448(2) | 2.440(2)  | 2.4089(9)  |
| Ln1-O6     | 2.599(6) | 2.590(3) | 2.586(3) | 2.592(2) | 2.591(2)  | 2.5474(7)  |
| Ln1-O9     | 2.501(5) | 2.495(3) | 2.493(4) | 2.487(2) | 2.479(2)  | 2.4480(8)  |
| Ln1-O10    | 2.430(5) | 2.407(3) | 2.405(4) | 2.391(2) | 2.384(2)  | 2.3537(8)  |
| Ln1-O13    | 2.367(5) | 2.352(3) | 2.334(4) | 2.342(2) | 2.339(2)  | 2.2954(8)  |
| Ln1-O14    | 2.580(6) | 2.583(3) | 2.579(4) | 2.590(2) | 2.596(2)  | 2.5785(9)  |
| Ln1-O18    | 2.453(6) | 2.427(3) | 2.414(4) | 2.411(2) | 2.399(2)  | 2.3701(9)  |
| Ln2-O2     | 2.385(6) | 2.371(3) | 2.360(4) | 2.361(2) | 2.353(2)  | 2.3095(8)  |
| Ln2-O3     | 2.350(5) | 2.334(3) | 2.322(4) | 2.334(2) | 2.332(2)  | 2.2896(8)  |
| Ln2-O6     | 2.547(6) | 2.527(3) | 2.519(3) | 2.508(2) | 2.494(2)  | 2.4647(7)  |
| Ln2-O7     | 2.315(5) | 2.313(3) | 2.306(4) | 2.305(2) | 2.301(2)  | 2.2671(8)  |
| Ln2-O13    | 2.374(6) | 2.366(3) | 2.354(4) | 2.351(2) | 2.350(2)  | 2.3175(7)  |
| Ln2-O17    | 2.438(6) | 2.426(3) | 2.419(4) | 2.413(2) | 2.410(2)  | 2.3753(9)  |
| Ln2-O28    | 2.476(6) | 2.468(4) | 2.448(4) | 2.447(3) | 2.443(3)  | 2.3989(11) |
| Ln2-O29    | 2.493(6) | 2.479(4) | 2.476(4) | 2.484(3) | 2.482(3)  | 2.4431(10) |
| Ln2-N10    | 2.506(8) | 2.479(4) | 2.475(4) | 2.474(3) | 2.476(3)  | 2.4397(11) |
| Ln3-O1     | 2.454(5) | 2.441(3) | 2.434(4) | 2.440(2) | 2.438(2)  | 2.4055(8)  |
| Ln3-O4     | 2.319(5) | 2.300(3) | 2.289(4) | 2.290(2) | 2.289(2)  | 2.2404(8)  |
| Ln3-O6     | 2.560(6) | 2.536(3) | 2.514(3) | 2.500(2) | 2.489(2)  | 2.4593(7)  |
| Ln3-O8     | 2.366(5) | 2.331(3) | 2.319(4) | 2.329(2) | 2.320(2)  | 2.2809(8)  |
| Ln3-O10    | 2.364(6) | 2.354(3) | 2.347(4) | 2.349(2) | 2.347(2)  | 2.3010(7)  |
| Ln3-O15    | 2.405(6) | 2.405(3) | 2.401(3) | 2.393(2) | 2.388(2)  | 2.3641(7)  |
| Ln3-O19    | 2.517(8) | 2.521(4) | 2.517(4) | 2.519(2) | 2.517(2)  | 2.4892(9)  |
| Ln3-O22    | 2.469(8) | 2.467(4) | 2.461(4) | 2.443(3) | 2.429(3)  | 2.4082(9)  |
| Ln3-N11    | 2.485(6) | 2.459(4) | 2.450(4) | 2.452(3) | 2.449(3)  | 2.4059(9)  |
| Ln4-O6     | 2.544(5) | 2.535(3) | 2.526(4) | 2.530(2) | 2.528(2)  | 2.4877(8)  |
| Ln4-O7     | 2.277(6) | 2.261(3) | 2.247(4) | 2.242(2) | 2.234(2)  | 2.2037(8)  |
| Ln4-O8     | 2.395(6) | 2.379(3) | 2.374(4) | 2.363(2) | 2.348(2)  | 2.3101(7)  |
| Ln4-O10    | 2.386(5) | 2.364(3) | 2.345(4) | 2.352(2) | 2.349(2)  | 2.3024(8)  |
| Ln4-O11    | 2.531(5) | 2.537(3) | 2.525(4) | 2.536(2) | 2.533(2)  | 2.5045(8)  |
| Ln4-O12    | 2.472(6) | 2.453(4) | 2.443(4) | 2.433(2) | 2.425(3)  | 2.3875(9)  |
| Ln4-O13    | 2.448(5) | 2.442(3) | 2.434(4) | 2.426(2) | 2.422(2)  | 2.3753(7)  |
| Ln4-O16    | 2.502(7) | 2.485(4) | 2.475(4) | 2.473(2) | 2.477(2)  | 2.4439(9)  |
| Ln4-O25    | 2.563(6) | 2.539(4) | 2.540(4) | 2.544(3) | 2.543(3)  | 2.5127(9)  |
| O3-Ln1-O4  | 94.4(2)  | 94.7(1)  | 94.7(1)  | 94.22(1) | 93.88(1)  | 94.64(3)   |
| O3-Ln1-O5  | 79.3(2)  | 79.4(1)  | 79.5(1)  | 79.81(1) | 80.10(1)  | 79.99(3)   |
| O3-Ln1-O6  | 68.7(2)  | 68.4(1)  | 68.5(1)  | 68.58(1) | 68.47(1)  | 68.50(2)   |
| O3-Ln1-O9  | 64.7(2)  | 65.1(1)  | 65.2(1)  | 65.78(1) | 66.06(1)  | 66.32(3)   |
| O3-Ln1-O10 | 129.2(2) | 129.0(1) | 129.1(1) | 128.8(1) | 128.86(1) | 129.23(3)  |
| O3-Ln1-O13 | 75.5(2)  | 75.6(1)  | 75.4(1)  | 75.7(1)  | 75.84(1)  | 75.43(3)   |

---

|             |          |          |          |           |           |           |
|-------------|----------|----------|----------|-----------|-----------|-----------|
| O3-Ln1-O14  | 143.0(2) | 143.0(1) | 142.7(1) | 142.4(1)  | 142.5(1)  | 142.38(3) |
| O3-Ln1-O18  | 140.8(2) | 141.7(1) | 141.7(1) | 142.0(1)  | 142.1(1)  | 142.58(3) |
| O4-Ln1-O5   | 149.1(2) | 149.1(1) | 148.8(1) | 148.66(1) | 148.41(1) | 148.46(3) |
| O4-Ln1-O6   | 69.1(2)  | 69.3(1)  | 69.0(1)  | 68.75(1)  | 68.69(1)  | 68.75(3)  |
| O4-Ln1-O9   | 77.5(2)  | 77.5(1)  | 77.5(1)  | 77.22(1)  | 77.17(1)  | 77.35(3)  |
| O4-Ln1-O10  | 75.1(2)  | 74.8(1)  | 74.9(1)  | 74.76(1)  | 74.87(1)  | 74.33(3)  |
| O4-Ln1-O13  | 130.0(2) | 130.6(1) | 130.7(1) | 130.26(1) | 130.5(1)  | 130.53(3) |
| O4-Ln1-O14  | 122.5(2) | 122.3(1) | 122.5(1) | 123.23(1) | 123.5(1)  | 122.90(3) |
| O4-Ln1-O18  | 84.1(2)  | 83.4(1)  | 83.7(1)  | 83.99(1)  | 84.07(1)  | 83.28(3)  |
| O5-Ln1-O6   | 133.1(2) | 133.0(1) | 133.5(1) | 133.90(1) | 134.15(1) | 134.36(3) |
| O5-Ln1-O9   | 72.5(2)  | 72.5(1)  | 72.3(1)  | 72.26(1)  | 72.03(1)  | 72.02(3)  |
| O5-Ln1-O10  | 131.8(2) | 132.1(1) | 132.0(1) | 132.37(1) | 132.4(1)  | 132.48(3) |
| O5-Ln1-O13  | 78.1(2)  | 77.7(1)  | 77.8(1)  | 78.40(1)  | 78.42(1)  | 78.52(3)  |
| O5-Ln1-O14  | 67.0(2)  | 67.15(1) | 67.0(1)  | 66.78(1)  | 66.70(1)  | 66.78(3)  |
| O5-Ln1-O18  | 82.3(2)  | 83.0(1)  | 82.5(1)  | 82.38(1)  | 82.20(1)  | 82.67(3)  |
| O6-Ln1-O9   | 119.0(2) | 119.0(1) | 119.1(1) | 119.51(1) | 119.77(1) | 119.73(3) |
| O6-Ln1-O10  | 61.0(2)  | 61.1(1)  | 61.2(1)  | 60.75(1)  | 60.90(1)  | 61.25(2)  |
| O6-Ln1-O13  | 61.6(2)  | 62.1(1)  | 62.4(1)  | 62.17(1)  | 62.42(1)  | 62.47(3)  |
| O6-Ln1-O14  | 125.1(2) | 124.8(1) | 124.8(1) | 124.27(1) | 124.2(1)  | 124.20(3) |
| O6-Ln1-O18  | 143.0(2) | 142.3(1) | 142.3(1) | 142.03(1) | 142.0(1)  | 141.32(3) |
| O9-Ln1-O10  | 150.0(2) | 149.7(1) | 149.6(1) | 149.12(1) | 149.0(1)  | 148.48(3) |
| O9-Ln1-O13  | 133.7(2) | 133.9(1) | 133.8(1) | 134.66(1) | 134.77(1) | 134.75(3) |
| O9-Ln1-O14  | 115.9(2) | 116.1(1) | 116.1(1) | 116.16(1) | 116.0(1)  | 115.99(3) |
| O9-Ln1-O18  | 76.9(2)  | 77.3(1)  | 77.17(1) | 76.89(1)  | 76.6(1)   | 76.86(3)  |
| O10-Ln1-O13 | 74.8(2)  | 75.0(1)  | 75.3(1)  | 74.95(1)  | 75.2(1)   | 75.70(3)  |
| O10-Dy1-O14 | 70.4(1)  | 70.58(1) | 70.6(2)  | 70.5(1)   | 70.4(1)   | 70.20(3)  |
| O10-Ln1-O18 | 88.4(2)  | 87.6(1)  | 87.5(1)  | 87.5(1)   | 87.3(1)   | 86.31(3)  |
| O13-Ln1-O14 | 82.6(2)  | 81.8(1)  | 81.7(1)  | 81.1(1)   | 80.7(1)   | 80.94(3)  |
| O13-Ln1-O18 | 133.4(2) | 132.8(1) | 132.8(1) | 132.6(1)  | 132.4(1)  | 132.62(3) |
| O14-Ln1-O18 | 50.8(2)  | 51.0(1)  | 51.1(1)  | 51.5(1)   | 51.7(1)   | 51.69(3)  |
| O2-Ln2-O3   | 83.0(2)  | 83.4(1)  | 84.1(1)  | 84.48(1)  | 84.72(1)  | 85.41(3)  |
| O2-Ln2-O6   | 53.7(2)  | 54.0(1)  | 54.2(1)  | 54.61(1)  | 54.75(1)  | 55.21(3)  |
| O2-Ln2-O7   | 81.2(2)  | 81.8(1)  | 81.8(1)  | 81.67(1)  | 81.81(1)  | 82.20(3)  |
| O2-Ln2-O13  | 115.9(2) | 116.9(1) | 117.3(1) | 118.0(1)  | 118.6(1)  | 118.72(3) |
| O2-Ln2-O17  | 76.7(2)  | 76.9(1)  | 76.7(1)  | 76.63(1)  | 76.70(1)  | 76.89(3)  |
| O2-Ln2-O28  | 144.6(2) | 143.9(1) | 144.4(1) | 144.0(1)  | 143.9(1)  | 143.86(3) |
| O2-Ln2-O29  | 147.9(2) | 147.8(1) | 147.1(1) | 147.0(1)  | 146.7(1)  | 146.74(3) |
| O2-Ln2-N10  | 71.5(2)  | 71.3(1)  | 71.5(1)  | 71.26(1)  | 71.25(1)  | 71.54(3)  |
| O3-Ln2-O6   | 70.2(2)  | 70.1(1)  | 70.3(1)  | 70.25(1)  | 70.22(1)  | 70.33(3)  |
| O3-Ln2-O7   | 137.0(2) | 137.1(1) | 137.1(1) | 137.2(1)  | 137.19(1) | 136.97(3) |
| O3-Ln2-O13  | 76.1(2)  | 76.1(1)  | 75.8(1)  | 75.7(1)   | 75.69(1)  | 75.44(3)  |
| O3-Ln2-O17  | 142.0(2) | 142.7(1) | 143.2(1) | 143.3(1)  | 143.7(1)  | 144.21(3) |
| O3-Ln2-O28  | 86.4(2)  | 87.2(1)  | 86.4(1)  | 86.2(1)   | 85.75(1)  | 84.05(3)  |
| O3-Ln2-O29  | 129.0(2) | 128.7(1) | 128.7(1) | 128.51(1) | 128.6(1)  | 127.72(3) |

---



---

|             |          |          |           |          |           |           |
|-------------|----------|----------|-----------|----------|-----------|-----------|
| O3-Ln2-N10  | 74.8(2)  | 75.1(1)  | 75.1(1)   | 74.96(1) | 74.95(1)  | 75.53(3)  |
| O6-Ln2-O7   | 68.2(2)  | 68.7(1)  | 68.6(1)   | 68.71(1) | 68.81(1)  | 68.76(3)  |
| O6-Ln2-O13  | 62.3(2)  | 62.9(1)  | 63.2(1)   | 63.39(1) | 63.83(1)  | 63.52(3)  |
| O6-Ln2-O17  | 118.6(2) | 119.0(1) | 119.0(1)  | 119.4(1) | 119.5(1)  | 120.14(3) |
| O6-Ln2-O28  | 149.5(2) | 150.5(1) | 149.7(1)  | 149.7(1) | 149.3(1)  | 147.70(3) |
| O6-Ln2-O29  | 132.5(2) | 132.0(1) | 132.2(1)  | 131.6(1) | 131.6(1)  | 132.20(3) |
| O6-Ln2-N10  | 116.8(2) | 116.8(1) | 116.9(1)  | 116.8(1) | 116.8(1)  | 117.45(3) |
| O4-Ln3-O19  | 75.6(2)  | 75.4(1)  | 75.3(1)   | 75.6(1)  | 75.7(1)   | 74.97(3)  |
| O7-Ln2-O13  | 70.5(2)  | 70.9(1)  | 71.0(1)   | 70.9(1)  | 70.84(1)  | 71.41(3)  |
| O7-Ln2-O17  | 126.0(2) | 126.2(1) | 126.1(1)  | 126.4(1) | 126.5(1)  | 127.22(3) |
| O7-Ln2-O28  | 75.0(2)  | 75.0(1)  | 74.8(1)   | 74.5(1)  | 74.2(1)   | 74.73(3)  |
| O7-Ln2-O29  | 135.8(2) | 135.4(1) | 135.9(1)  | 135.9(1) | 136.1(1)  | 136.66(3) |
| O7-Ln2-N10  | 141.8(2) | 141.2(1) | 141.0(1)  | 141.0(1) | 140.6(1)  | 140.34(3) |
| O13-Ln2-O17 | 93.9(2)  | 94.2(1)  | 93.2(1)   | 93.1(1)  | 92.4(1)   | 91.74(3)  |
| O13-Ln2-O28 | 79.7(2)  | 78.6(1)  | 78.8(1)   | 78.1(1)  | 77.7(1)   | 78.17(3)  |
| O13-Ln2-O29 | 148.8(2) | 148.7(1) | 148.3(1)  | 148.1(1) | 147.9(1)  | 148.10(3) |
| O13-Ln2-N10 | 91.9(2)  | 90.5(1)  | 91.3(1)   | 90.9(1)  | 91.2(1)   | 92.15(3)  |
| O17-Ln2-O28 | 74.8(2)  | 74.7(1)  | 74.0(1)   | 74.1(1)  | 73.8(1)   | 73.25(3)  |
| O17-Ln2-O29 | 68.5(2)  | 68.8(1)  | 69.2(1)   | 69.3(1)  | 69.7(1)   | 69.45(3)  |
| O17-Ln2-N10 | 51.2(2)  | 51.2(1)  | 51.3(1)   | 51.9(1)  | 52.3(1)   | 52.50(3)  |
| O28-Ln2-O29 | 72.6(2)  | 72.6(1)  | 72.9(1)   | 72.7(1)  | 72.6(1)   | 72.36(4)  |
| O28-Ln2-N10 | 110.5(2) | 111.1(1) | 110.7(1)  | 111.4(1) | 111.5(1)  | 110.22(3) |
| O29-Ln2-N10 | 69.5(2)  | 69.7(1)  | 69.8(1)   | 69.9(1)  | 70.1(1)   | 70.23(3)  |
| O1-Ln3-O4   | 115.1(2) | 115.6(1) | 115.8(1)  | 116.3(1) | 116.5(1)  | 116.75(3) |
| O1-Ln3-O6   | 140.1(2) | 140.6(1) | 140.9(1)  | 141.2(1) | 141.7(1)  | 142.30(3) |
| O1-Ln3-O8   | 142.2(2) | 141.8(1) | 141.9(1)  | 141.7(1) | 141.4(1)  | 141.42(3) |
| O1-Ln3-O10  | 74.3(2)  | 74.9(1)  | 74.8(1)   | 74.9(1)  | 75.0(1)   | 75.25(3)  |
| O1-Ln3-O15  | 111.2(2) | 113.5(1) | 113.63(1) | 113.8(1) | 114.1(1)  | 112.96(3) |
| O1-Ln3-O19  | 72.9(2)  | 72.3(1)  | 71.9(1)   | 71.8(1)  | 71.7(1)   | 71.76(3)  |
| O1-Ln3-O22  | 68.2(2)  | 68.6(1)  | 68.7(1)   | 68.6(1)  | 68.7(1)   | 68.55(3)  |
| O1-Ln3-N11  | 69.1(2)  | 69.6(1)  | 69.7(1)   | 69.9(1)  | 69.9(1)   | 69.93(3)  |
| O4-Ln3-O6   | 137.0(2) | 137.2(1) | 137.8(1)  | 137.3(1) | 137.0(1)  | 136.96(3) |
| O4-Ln3-O8   | 75.5(2)  | 75.0(1)  | 75.1(1)   | 74.9(1)  | 74.7(1)   | 74.76(3)  |
| O4-Ln3-O10  | 83.7(2)  | 84.7(1)  | 85.0(1)   | 85.41(1) | 85.8(1)   | 85.90(3)  |
| O4-Ln3-O15  | 126.2(2) | 126.5(1) | 126.7(1)  | 126.8(1) | 126.9(1)  | 127.24(3) |
| O4-Ln3-O22  | 84.2(2)  | 85.2(1)  | 85.0(1)   | 85.0(1)  | 85.1(1)   | 83.95(3)  |
| O4-Ln3-N11  | 135.9(2) | 136.8(1) | 136.2(1)  | 137.4(1) | 137.6(1)  | 137.71(3) |
| O6-Ln3-O8   | 69.1(2)  | 69.0(1)  | 69.0(1)   | 68.95(1) | 68.8(1)   | 68.99(3)  |
| O6-Ln3-O10  | 62.4(2)  | 62.6(1)  | 62.9(1)   | 62.70(1) | 62.95(1)  | 63.32(3)  |
| O6-Ln3-O15  | 53.6(2)  | 53.7(1)  | 53.8(1)   | 54.66(1) | 54.88(1)  | 54.92(2)  |
| O6-Ln3-O19  | 133.5(2) | 130.8(1) | 130.7(2)  | 129.8(1) | 129.4(1)  | 130.21(3) |
| O6-Ln3-O22  | 145.1(2) | 146.9(1) | 146.0(1)  | 147.0(1) | 147.0(1)  | 145.71(3) |
| O6-Ln3-N11  | 119.9(2) | 120.6(1) | 120.6(1)  | 121.7(1) | 122.03(1) | 122.30(3) |
| O8-Ln3-O10  | 76.8(2)  | 76.8(1)  | 76.2(1)   | 76.5(1)  | 76.36(1)  | 75.92(3)  |

---

---

|             |          |          |          |           |           |           |
|-------------|----------|----------|----------|-----------|-----------|-----------|
| O8-Ln3-O15  | 79.7(2)  | 79.6(1)  | 79.5(1)  | 80.2(1)   | 80.31(1)  | 80.97(3)  |
| O8-Ln3-O19  | 78.4(2)  | 76.0(1)  | 76.5(1)  | 74.7(1)   | 74.18(1)  | 73.95(3)  |
| O8-Ln3-O22  | 128.0(2) | 126.9(1) | 126.5(1) | 126.5(1)  | 126.3(1)  | 126.29(3) |
| O8-Ln3-N11  | 75.8(2)  | 75.9(1)  | 75.9(1)  | 76.42(1)  | 76.84(1)  | 77.34(3)  |
| O10-Ln3-O15 | 116.0(2) | 116.3(1) | 116.5(1) | 117.3(1)  | 117.8(1)  | 118.21(3) |
| O10-Ln3-O19 | 78.8(2)  | 76.8(1)  | 76.3(1)  | 76.16(1)  | 75.78(1)  | 76.43(3)  |
| O10-Ln3-O22 | 90.1(2)  | 91.0(1)  | 91.7(1)  | 90.73(1)  | 90.43(1)  | 89.12(3)  |
| O10-Ln3-N11 | 148.6(2) | 148.2(1) | 147.1(1) | 147.71(1) | 147.62(1) | 147.44(3) |
| O15-Ln3-O19 | 149.7(2) | 148.8(1) | 148.5(1) | 147.78(1) | 147.3(1)  | 146.86(3) |
| O15-Ln3-O22 | 147.2(2) | 147.1(1) | 147.6(1) | 146.6(1)  | 146.7(1)  | 147.00(3) |
| O15-Ln3-N11 | 73.6(2)  | 74.3(1)  | 74.1(1)  | 74.7(1)   | 74.75(1)  | 74.99(3)  |
| O19-Ln3-O22 | 49.7(3)  | 51.0(1)  | 50.3(1)  | 51.8(1)   | 52.1(1)   | 52.36(3)  |
| O19-Ln3-N11 | 80.9(2)  | 81.0(1)  | 80.3(1)  | 79.94(1)  | 79.69(1)  | 78.60(3)  |
| O22-Ln3-N11 | 94.8(2)  | 92.4(1)  | 92.4(1)  | 91.32(1)  | 90.94(1)  | 91.95(3)  |
| O6-Ln4-O7   | 68.8(2)  | 69.3(1)  | 69.2(1)  | 69.21(1)  | 69.18(1)  | 69.28(3)  |
| O6-Ln4-O8   | 69.0(2)  | 68.32(1) | 68.8(1)  | 67.93(1)  | 67.72(1)  | 68.04(3)  |
| O6-Ln4-O10  | 62.4(2)  | 62.5(1)  | 62.2(1)  | 62.18(1)  | 62.30(1)  | 62.85(3)  |
| O6-Ln4-O11  | 116.2(2) | 116.1(1) | 116.3(1) | 116.60(1) | 116.7(1)  | 117.04(2) |
| O6-Ln4-O12  | 143.7(2) | 143.4(1) | 143.3(1) | 144.75(1) | 145.1(1)  | 144.69(3) |
| O6-Ln4-O13  | 61.4(2)  | 61.8(1)  | 62.0(1)  | 62.06(1)  | 62.3(1)   | 62.38(2)  |
| O6-Ln4-O16  | 128.7(2) | 127.3(1) | 127.6(1) | 126.93(1) | 127.1(1)  | 128.04(3) |
| O6-Ln4-O25  | 127.7(2) | 127.9(1) | 127.7(1) | 127.43(1) | 127.4(1)  | 127.48(3) |
| O7-Ln4-O8   | 96.0(2)  | 96.1(1)  | 96.2(1)  | 95.22(1)  | 95.0(1)   | 95.79(3)  |
| O7-Ln4-O10  | 130.2(2) | 130.7(1) | 131.1(1) | 130.41(1) | 130.5(1)  | 131.19(3) |
| O7-Ln4-O11  | 75.8(2)  | 75.4(1)  | 75.5(1)  | 75.28(1)  | 75.2(1)   | 75.06(3)  |
| O7-Ln4-O12  | 85.0(2)  | 84.2(1)  | 84.9(1)  | 85.49(1)  | 85.8(1)   | 84.97(3)  |
| O7-Ln4-O13  | 74.8(2)  | 74.9(1)  | 74.8(13) | 75.28(1)  | 75.4(1)   | 74.98(3)  |
| O7-Ln4-O16  | 148.6(2) | 148.6(1) | 148.3(2) | 148.04(1) | 147.8(1)  | 147.58(3) |
| O7-Ln4-O25  | 125.5(2) | 125.5(1) | 125.9(1) | 126.80(1) | 127.1(1)  | 126.64(3) |
| O8-Ln4-O10  | 75.8(2)  | 75.7(1)  | 75.6(1)  | 75.83(1)  | 75.8(1)   | 75.33(3)  |
| O8-Ln4-O11  | 64.1(2)  | 64.6(1)  | 64.8(1)  | 65.07(1)  | 65.4(1)   | 66.02(3)  |
| O8-Ln4-O12  | 141.1(2) | 141.9(1) | 141.6(1) | 141.16(1) | 141.1(1)  | 140.91(3) |
| O8-Ln4-O13  | 129.5(2) | 129.3(1) | 129.4(1) | 129.25(1) | 129.3(1)  | 129.67(3) |
| O8-Ln4-O16  | 72.6(2)  | 71.7(1)  | 71.9(2)  | 71.68(1)  | 71.8(1)   | 72.11(3)  |
| O8-Ln4-O25  | 138.0(2) | 137.9(1) | 137.5(1) | 137.6(1)  | 137.6(1)  | 137.21(3) |
| O10-Ln4-O11 | 135.0(2) | 135.3(1) | 135.1(1) | 135.6(1)  | 135.8(1)  | 135.80(3) |
| O10-Ln4-O12 | 131.3(2) | 131.3(1) | 130.7(1) | 131.2(1)  | 131.0(1)  | 131.45(3) |
| O10-Ln4-O13 | 74.1(2)  | 74.2(1)  | 74.6(1)  | 74.11(1)  | 74.3(1)   | 75.15(3)  |
| O10-Ln4-O16 | 76.4(2)  | 75.6(1)  | 75.5(2)  | 75.79(1)  | 75.9(1)   | 75.97(3)  |
| O10-Ln4-O25 | 80.7(2)  | 80.4(1)  | 79.7(1)  | 79.68(1)  | 79.4(1)   | 79.42(3)  |
| O11-Ln4-O12 | 78.8(2)  | 78.9(1)  | 78.5(1)  | 77.76(1)  | 77.4(1)   | 76.63(3)  |
| O11-Ln4-O13 | 148.7(2) | 148.4(1) | 148.3(1) | 148.34(1) | 148.2(1)  | 147.46(3) |
| O11-Ln4-O16 | 72.9(2)  | 73.3(1)  | 72.9(2)  | 72.77(1)  | 72.6(1)   | 72.54(3)  |
| O11-Ln4-O25 | 116.1(2) | 116.1(1) | 116.1(1) | 115.96(1) | 115.9(1)  | 115.48(3) |

---

|             |          |          |          |          |          |           |
|-------------|----------|----------|----------|----------|----------|-----------|
| O12-Ln4-O13 | 88.4(2)  | 87.7(1)  | 88.1(1)  | 88.58(1) | 88.6(1)  | 88.39(3)  |
| O12-Ln4-O16 | 86.5(2)  | 88.3(1)  | 87.2(2)  | 87.41(1) | 86.9(1)  | 86.49(3)  |
| O12-Ln4-O25 | 50.7(2)  | 51.0(1)  | 51.1(1)  | 51.57(1) | 51.6(1)  | 52.06(3)  |
| O13-Ln4-O16 | 135.2(2) | 135.4(1) | 135.6(2) | 135.7(1) | 135.7(1) | 135.98(3) |
| O13-Ln4-O25 | 74.2(2)  | 74.2(1)  | 74.2(1)  | 74.09(1) | 73.9(1)  | 74.01(3)  |
| O16-Ln4-O25 | 68.3(2)  | 69.1(1)  | 68.8(2)  | 69.07(1) | 69.0(1)  | 68.56(3)  |

**Table S2** Main magnetic data extracted from the static properties of the tetranuclear compounds **1–6**.

|                                                                                                            | <b>1</b>                      | <b>2</b>                    | <b>3</b>                       | <b>4</b>                    | <b>5</b>                       | <b>6</b>                      |
|------------------------------------------------------------------------------------------------------------|-------------------------------|-----------------------------|--------------------------------|-----------------------------|--------------------------------|-------------------------------|
| Ground state term of Ln <sup>III</sup> ion                                                                 | <sup>8</sup> S <sub>7/2</sub> | <sup>7</sup> F <sub>6</sub> | <sup>6</sup> H <sub>15/2</sub> | <sup>5</sup> I <sub>8</sub> | <sup>4</sup> I <sub>15/2</sub> | <sup>2</sup> F <sub>7/2</sub> |
| <i>S</i>                                                                                                   | 7/2                           | 6/2                         | 5/2                            | 4/2                         | 3/2                            | 1/2                           |
| <i>g</i>                                                                                                   | 2                             | 3/2                         | 4/3                            | 5/4                         | 6/5                            | 8/7                           |
| <i>C</i> (cm <sup>3</sup> Kmol <sup>-1</sup> ) for each Ln <sup>III</sup> ion                              | 7.88                          | 11.82                       | 14.17                          | 14.07                       | 11.50                          | 2.57                          |
| $\chi_m T$ (cm <sup>3</sup> Kmol <sup>-1</sup> ) expected value or 4 non-interacting Ln <sub>4</sub> at rt | 31.50                         | 47.28                       | 56.68                          | 56.28                       | 46.00                          | 10.28                         |
| $\chi_m T$ (cm <sup>3</sup> Kmol <sup>-1</sup> ) experimental value for Ln <sub>4</sub> at rt              | 31.55                         | 47.65                       | 55.43                          | 52.76                       | 45.25                          | 9.90                          |
| $\chi_m T$ (cm <sup>3</sup> Kmol <sup>-1</sup> ) experimental value for Ln <sub>4</sub> at 2.0 K           | 25.60                         | 18.89                       | 32.60                          | 27.92                       | 18.06                          | 3.93                          |
